# Supplementary material for: Three powerful dinuclear metal–organic catalysts for converting CO2 into organic carbonates
Source: Royal Society of Chemistry journal article supplement (doi:10.1039/c6dt02755e), 2016-01-01

**Electronic Supplementary Material (ESI) for Journal Name**  
**This journal is © The Royal Society of Chemistry**

---

**Electronic supplementary information (ESI)**

**Three powerful dinuclear metal-organic catalysts for converting  
CO<sub>2</sub> into organic carbonates**

Dan Zhao, Xiao-Hui Liu, Zhuang-Zhi Shi, Chen-Dan Zhu, Yue Zhao, Peng Wang and Wei-Yin Sun\*

*Coordination Chemistry Institute, State Key Laboratory of Coordination Chemistry, School of Chemistry and Chemical Engineering, Nanjing National Laboratory of Microstructures, Collaborative Innovation Center of Advanced Microstructures, Nanjing University, Nanjing 210023, China. E-mail: [sunwy@nju.edu.cn](mailto:sunwy@nju.edu.cn)*

**Table of Contents**

|                                                              |            |
|--------------------------------------------------------------|------------|
| <b>Experimental section.....</b>                             | <b>S2</b>  |
| Structures of the organic ligands HL, L2 and L3              |            |
| Crystallographic data and structure refinements              |            |
| Power X-ray diffraction (PXRD)                               |            |
| Figures of HPLC                                              |            |
| <b>Characterization data of compounds.....</b>               | <b>S7</b>  |
| <b>Copies of <sup>1</sup>H NMR, <sup>13</sup>C NMR .....</b> | <b>S11</b> |

## Experimental section

### Structure of the organic ligands HL, L2 and L3:

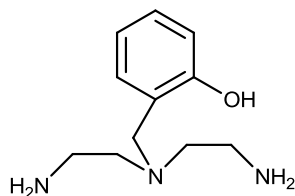

**Chart S1** The organic ligand HL.

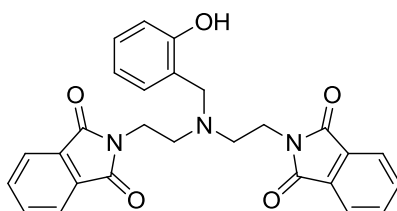

**Chart S2** The structure of L2.

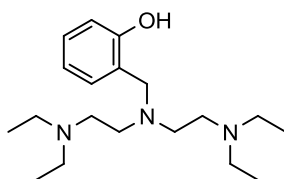

**Chart S3** The structure of L3.

Crystallographic data and structure refinements:

Table S1 Crystallographic data for **L3-Zn**, **(R)-2a** and **(S)-2a**

|                                                                                                                                        | <b>L3-Zn</b>                                                        | <b>(R)-2a</b>                                         | <b>(S)-2a</b>                                         |
|----------------------------------------------------------------------------------------------------------------------------------------|---------------------------------------------------------------------|-------------------------------------------------------|-------------------------------------------------------|
| formula                                                                                                                                | C <sub>19</sub> H <sub>38</sub> N <sub>3</sub> O <sub>7</sub> Cl Zn | C <sub>9</sub> H <sub>8</sub> O <sub>3</sub>          | C <sub>9</sub> H <sub>8</sub> O <sub>3</sub>          |
| <i>fw</i>                                                                                                                              | 521.34                                                              | 164.15                                                | 164.15                                                |
| crystal system                                                                                                                         | Monoclinic                                                          | orthorhombic                                          | Orthorhombic                                          |
| space group                                                                                                                            | <i>P</i> 2 <sub>1</sub>                                             | <i>P</i> 2 <sub>1</sub> 2 <sub>1</sub> 2 <sub>1</sub> | <i>P</i> 2 <sub>1</sub> 2 <sub>1</sub> 2 <sub>1</sub> |
| <i>T</i> (K)                                                                                                                           | 293(2)                                                              | 173(2)                                                | 173(2)                                                |
| <i>a</i> (Å)                                                                                                                           | 9.7985(8)                                                           | 6.1207(5)                                             | 6.1196(4)                                             |
| <i>b</i> (Å)                                                                                                                           | 13.1054(9)                                                          | 7.5850(6)                                             | 7.5799(5)                                             |
| <i>c</i> (Å)                                                                                                                           | 9.8329(8)                                                           | 16.9844(14)                                           | 16.9823(12)                                           |
| $\beta$ (°)                                                                                                                            | 97.233(3)                                                           | 90                                                    | 90                                                    |
| <i>V</i> (Å <sup>3</sup> )                                                                                                             | 1252.63(17)                                                         | 788.51(11)                                            | 787.74(9)                                             |
| <i>Z</i>                                                                                                                               | 2                                                                   | 4                                                     | 4                                                     |
| <i>D<sub>c</sub></i> (g cm <sup>-3</sup> )                                                                                             | 1.382                                                               | 1.383                                                 | 1.384                                                 |
| <i>F</i> (000)                                                                                                                         | 552                                                                 | 344                                                   | 344                                                   |
| $\theta$ for data collection (°)                                                                                                       | 2.60 - 25.00                                                        | 6.39 - 65.50                                          | 5.21 - 64.97                                          |
| <i>R</i> <sub>1</sub> <sup>a</sup> , [ <i>I</i> > 2σ( <i>I</i> )]                                                                      | 0.0677                                                              | 0.0255                                                | 0.0262                                                |
| <i>wR</i> <sub>2</sub> <sup>b</sup> , [ <i>I</i> > 2σ( <i>I</i> )]                                                                     | 0.1872                                                              | 0.0676                                                | 0.0667                                                |
| <i>GOF</i>                                                                                                                             | 1.077                                                               | 1.079                                                 | 1.065                                                 |
| <sup>a</sup> $R_1 = \sum   F_o  -  F_c   / \sum  F_o $ . <sup>b</sup> $wR_2 = \{\sum [w(F_o^2 - F_c^2)^2] / \sum [w(F_o^2)^2]\}^{1/2}$ |                                                                     |                                                       |                                                       |

Power X-ray diffraction (PXRD)

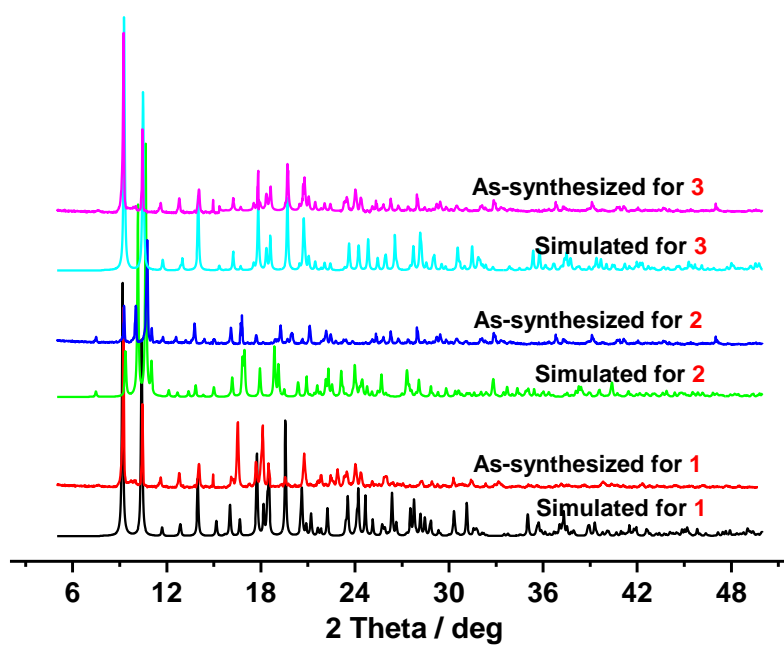

Figure S1 PXRD of 1 - 3.

## HPLC

Styrene oxide was isolated as a colorless solid by flash chromatography using petroleum hexane/EtOAc (5:1) as eluent.  $R_f = 0.41$ ;  $^1\text{H NMR}$  (400 MHz,  $\text{CDCl}_3$ )  $\delta$  7.41-7.48 (m, 3H), 7.34-7.39 (m, 2H), 5.68 (t,  $J = 8.0$  1H), 4.80 (t,  $J = 8.0$  1H), 4.35 (t,  $J = 8.0$  1H); The enantiomeric excess was determined by chiral HPLC using a Chiralcel OD column (4.6 mm x 250 mm) with hexane/isopropanol (90:10) as eluent and a flow rate of 1.0 mL/min.  $t_{R1}=21.05$  min,  $t_{R2}=26.53$  min. Detection wavelength: 220 nm.

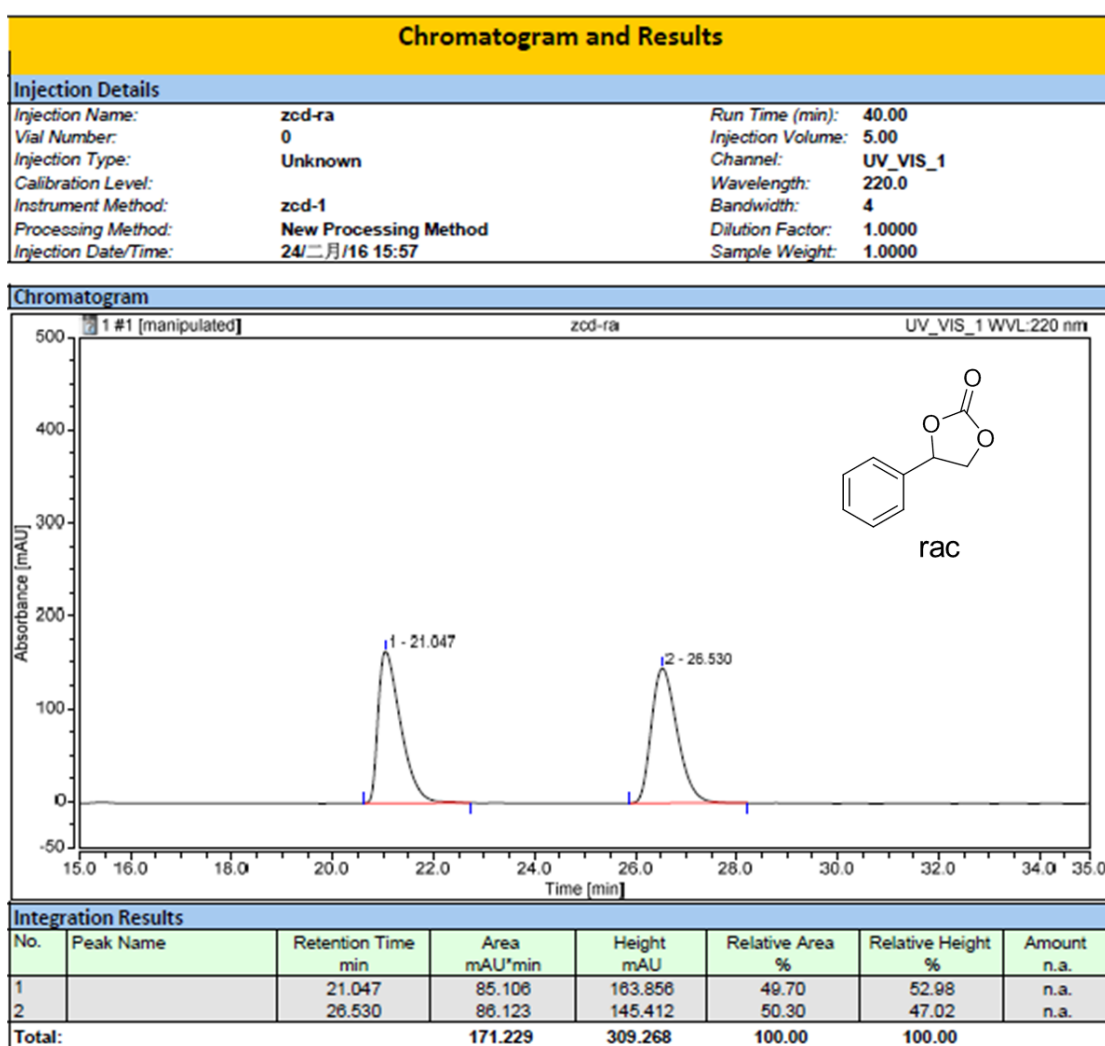

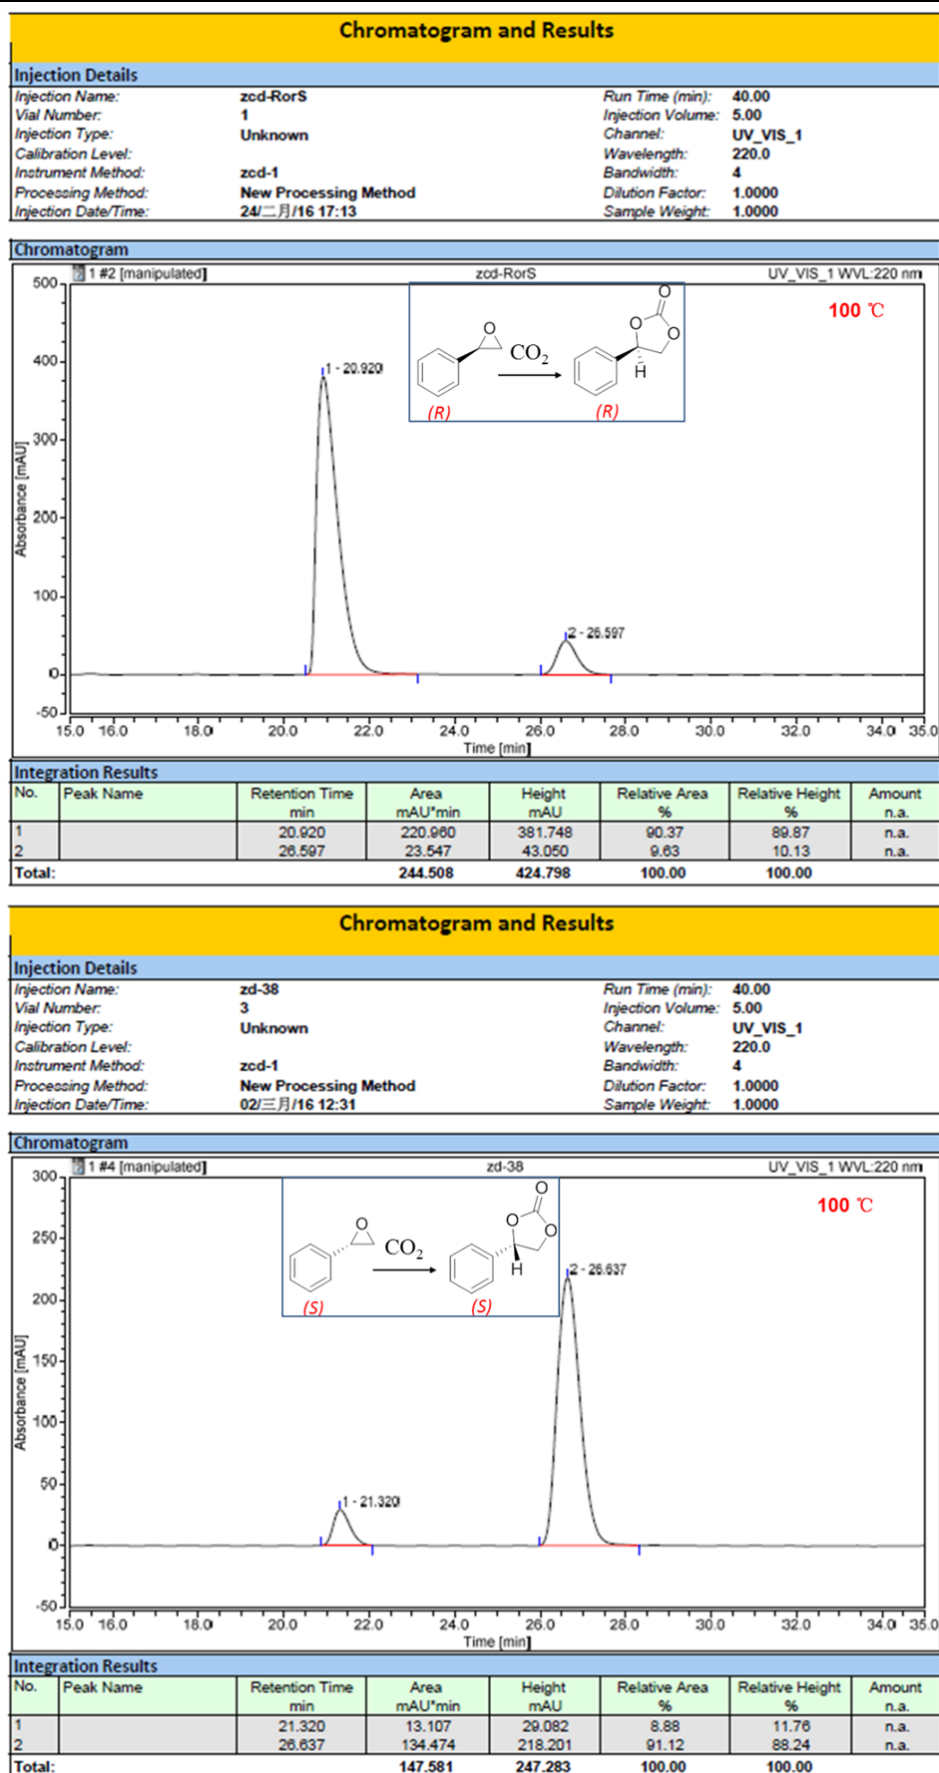

Figure S2 The figures of HPLC

### Characterization data of compounds

#### 4-phenyl-1,3-dioxolan-2-one **2a**

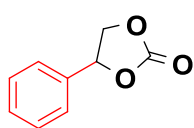

$R_f = 0.7$  (EA/Hexane = 1:5), Yield 79%, colorless crystalline.  $^1\text{H NMR}$  (300 MHz,  $\text{CDCl}_3$ ):  $\delta$  7.49-7.42 (m, 3H), 7.40-7.33 (m, 2H), 5.68 (t,  $J = 8.1$  Hz, 1H), 4.81 (t,  $J = 8.4$  Hz, 1H), 4.35 (dd,  $J = 8.1$  Hz, 8.7 Hz, 1H) ppm;  $^{13}\text{C NMR}$  (100 MHz,  $\text{CDCl}_3$ ):  $\delta$  154.89, 135.82, 129.74, 129.24, 125.91, 78.03, 71.20 ppm. See also: J. Melendez, M. North and P. Villuendas, *Chem. Commun.*, 2009, **18**, 2577.

#### 4-(4-fluorophenyl)-1,3-dioxolan-2-one **2b**

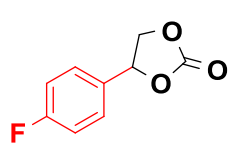

$R_f = 0.6$  (EA/Hexane = 1:6), Yield 80%, white solid.  $^1\text{H NMR}$  (300 MHz,  $\text{CDCl}_3$ ):  $\delta$  7.44-7.31 (m, 2H), 7.20-7.09 (m, 2H), 5.67 (t,  $J = 8.0$  Hz, 1H), 4.80 (t,  $J = 8.4$  Hz, 1H), 4.33 (dd,  $J = 8.7$  Hz, 7.9 Hz, 1H) ppm;  $^{13}\text{C NMR}$  (100 MHz,  $\text{CDCl}_3$ ):  $\delta$  163.37 (d,  $J = 248.0$  Hz), 154.65, 131.62 (d,  $J = 3.0$  Hz), 128.09, 128.01, 116.45, 116.23, 77.45, 71.11 ppm.  $^{19}\text{F NMR}$  (376 MHz,  $\text{CDCl}_3$ ):  $\delta$  -110.97 ppm. See also: C. William, H. Ross W, N. Michael and P. Riccardo, *Chem. Eur. J.*, 2010, **16**, 6828.

#### 4-(4-chlorophenyl)-1,3-dioxolan-2-one **2c**

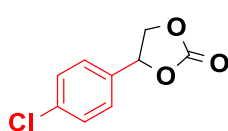

$R_f = 0.8$  (EA/Hexane = 1:3), Yield 80%, white solid.  $^1\text{H NMR}$  (300 MHz,  $\text{CDCl}_3$ ):  $\delta$  7.48-7.38 (m, 2H), 7.37-7.28 (m, 2H), 5.66 (t,  $J = 8.0$  Hz, 1H), 4.81 (t,  $J = 8.4$  Hz, 1H), 4.31 (dd,  $J = 8.7$  Hz, 7.8 Hz, 1H) ppm;  $^{13}\text{C NMR}$  (100 MHz,  $\text{CDCl}_3$ ):  $\delta$  154.52, 135.79, 134.29, 129.52, 127.26, 77.24, 71.00 ppm.

#### 4-(4-bromophenyl)-1,3-dioxolan-2-one **2d**

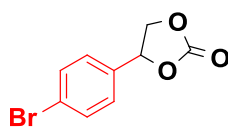

$R_f = 0.7$  (EA/Hexane = 1:5), Yield 78%, white solid.  $^1\text{H NMR}$  (300 MHz,  $\text{CDCl}_3$ ):  $\delta$  7.62-7.53 (m, 2H), 7.29-7.20 (m, 2H), 5.64 (t,  $J = 8.0$  Hz, 1H), 4.80 (t,  $J = 8.4$  Hz, 1H), 4.30 (dd,  $J = 8.7$  Hz, 7.7 Hz, 1H) ppm;  $^{13}\text{C NMR}$  (100 MHz,  $\text{CDCl}_3$ ):  $\delta$  154.50, 134.82, 132.48, 127.48, 123.92, 77.25, 70.93 ppm.

#### 4-(4-tert-butylphenyl)-1,3-dioxolan-2-one **2e**

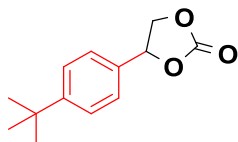

$R_f = 0.8$  (EA/Hexane = 1:5), Yield 71%, white solid.  $^1\text{H NMR}$  (300 MHz,  $\text{CDCl}_3$ ):  $\delta$  7.50-7.43 (m, 2H), 7.34-7.28 (m, 2H), 5.66 (t,  $J = 8.0$  Hz, 1H),

4.78 (t,  $J = 8.4$  Hz, 1H), 4.36 (dd,  $J = 8.6$  Hz, 8.0 Hz, 1H), 1.33 (s, 9H) ppm;  $^{13}\text{C}$  NMR (100 MHz,  $\text{CDCl}_3$ ):  $\delta$  154.91, 153.11, 132.64, 126.18, 125.83, 78.05, 71.11, 34.78, 31.22 ppm. HRMS (EI)  $m/z$  calcd for  $\text{C}_{13}\text{H}_{16}\text{O}_3$   $[\text{M}+\text{Na}]^+$ : 243.0997; found: 243.2875.

4-*p*-tolyl-1,3-dioxolan-2-one **2f**

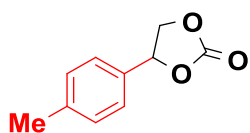

$R_f = 0.6$  (EA/Hexane = 1:8), Yield 75%, colorless crystalline.  $^1\text{H}$  NMR (300 MHz,  $\text{CDCl}_3$ ):  $\delta$  7.25 (s, 4H), 5.64 (t,  $J = 8.0$  Hz, 1H), 4.77 (t,  $J = 8.3$  Hz, 1H), 4.34 (dd,  $J = 8.6$  Hz, 7.9 Hz, 1H), 2.39 (s, 3H) ppm;  $^{13}\text{C}$  NMR (100 MHz,  $\text{CDCl}_3$ ):  $\delta$  154.96, 139.87, 132.72, 129.87, 126.03, 78.14, 71.20 ppm. See also: J. Melendez, M. North and P. Villuendas, *Chem. Commun.*, 2009, **18**, 2577.

4-(4-methoxyphenyl)-1,3-dioxolan-2-one **2g**

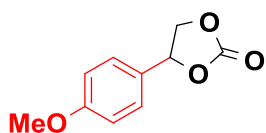

$R_f = 0.7$  (EA/Hexane = 1:10), Yield 76%, yellow solid.  $^1\text{H}$  NMR (300 MHz,  $\text{CDCl}_3$ ):  $\delta$  7.34-7.27 (m, 2H), 6.99-6.92 (m, 2H), 5.62 (t,  $J = 8.1$  Hz, 1H), 4.75 (t,  $J = 8.4$  Hz, 1H), 4.35 (dd,  $J = 8.7$  Hz, 8.1 Hz, 3H), 3.83 (s, 3H) ppm;  $^{13}\text{C}$  NMR (100 MHz,  $\text{CDCl}_3$ ):  $\delta$  160.74, 154.90, 127.81, 127.40, 114.59, 78.17, 71.11, 55.41 ppm. HRMS (EI)  $m/z$  calcd for  $\text{C}_{10}\text{H}_{10}\text{O}_4$   $[\text{M}+\text{Na}]^+$ : 217.0477; found: 217.0472.

4-(4-(trifluoromethyl)phenyl)-1,3-dioxolan-2-one **2h**

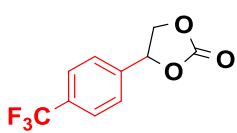

$R_f = 0.7$  (EA/Hexane = 1:5), Yield 72%, light yellow oil.  $^1\text{H}$  NMR (300 MHz,  $\text{CDCl}_3$ ):  $\delta$  7.7-7.56 (m, 3H), 7.54-7.41 (m, 1H), 6.11-5.93 (m, 1H), 4.81 (td,  $J = 8.7$  Hz, 1.3 Hz, 1H), 4.14 (dd,  $J = 8.8$  Hz, 7.2 Hz, 1H) ppm;  $^{13}\text{C}$  NMR (100 MHz,  $\text{CDCl}_3$ ):  $\delta$  154.68, 139.98, 131.56 (q,  $J = 32.5$  Hz), 126.20, 126.16, 126.13, 126.09, 123.71 (q,  $J = 270.7$  Hz), 77.06, 70.98 ppm;  $^{19}\text{F}$  NMR (376 MHz,  $\text{CDCl}_3$ ):  $\delta$  -62.96 ppm. HRMS (EI)  $m/z$  calcd for  $\text{C}_{10}\text{H}_7\text{F}_3\text{O}_3$   $[\text{M}+\text{Na}]^+$ : 255.0245; found: 255.0240.

4-*m*-tolyl-1,3-dioxolan-2-one **2i**

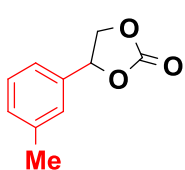

$R_f = 0.6$  (EA/Hexane = 1:8), Yield 84%, light yellow oil.  $^1\text{H}$  NMR (400 MHz,  $\text{CDCl}_3$ ):  $\delta$  7.35-7.05 (m, 4H), 5.70-5.54 (m, 1H), 4.84-4.64 (m, 1H), 4.35-4.13 (m, 1H), 2.21 (s, 3H) ppm;  $^{13}\text{C}$  NMR (100 MHz,  $\text{CDCl}_3$ ):  $\delta$  155.18, 139.01, 136.07, 130.32, 129.02, 126.70, 123.17, 78.17, 71.23, 21.23 ppm. HRMS (EI)  $m/z$  calcd for  $\text{C}_{10}\text{H}_{10}\text{O}_3$   $[\text{M}+\text{Na}]^+$ : 201.0528; found: 201.0523.



4-(3-methoxyphenyl)-1,3-dioxolan-2-one **2j**

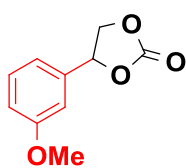

$R_f = 0.7$  (EA/Hexane = 1:10), Yield 84%, yellow oil.  $^1\text{H}$  NMR (400 MHz, DMSO- $d_6$ ):  $\delta$  7.38 (t,  $J = 7.9$  Hz, 1H), 7.16-6.93 (m, 3H), 5.84 (t,  $J = 8.0$  Hz, 1H), 4.89 (td,  $J = 8.2$  Hz, 1.2 Hz, 1H), 4.43 (ddd,  $J = 8.8$  Hz, 7.9 Hz, 1.0 Hz, 1H), 3.79 (s, 3H) ppm;  $^{13}\text{C}$  NMR (100 MHz, DMSO- $d_6$ ):  $\delta$  159.56, 154.71, 137.77, 130.03, 118.45, 114.81, 111.98, 77.63, 70.77, 55.11 ppm. See also: C. William, W. H. Ross, N. Michael and P. Riccardo, *Chem. Eur. J.*, 2010, **16**, 6828.

4-(3-(trifluoromethyl)phenyl)-1,3-dioxolan-2-one **2k**

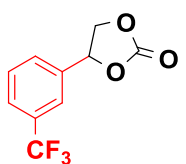

$R_f = 0.7$  (EA/Hexane = 1:5), Yield 74%, light yellow oil.  $^1\text{H}$  NMR (300 MHz,  $\text{CDCl}_3$ ):  $\delta$  7.70-7.45 (m, 4H), 5.77 (t,  $J = 8.0$  Hz, 1H), 4.92-4.78 (m, 1H), 4.37-4.20 (m, 1H) ppm;  $^{13}\text{C}$  NMR (100 MHz,  $\text{CDCl}_3$ ):  $\delta$  154.75, 137.13, 131.29 (q,  $J = 32.4$  Hz), 129.88, 129.31, 126.31 (q,  $J = 3.7$  Hz), 123.72 (q,  $J = 270.7$  Hz), 122.76 (q,  $J = 3.7$  Hz), 77.52, 71.01 ppm;  $^{19}\text{F}$  NMR (376 MHz,  $\text{CDCl}_3$ ):  $\delta$  -62.87 ppm. HRMS (EI)  $m/z$  calcd for  $\text{C}_{10}\text{H}_7\text{F}_3\text{O}_3$   $[\text{M}+\text{Na}]^+$ : 255.0245; found: 255.0241.

4-o-tolyl-1,3-dioxolan-2-one **2l**

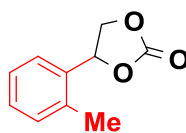

$R_f = 0.6$  (EA/Hexane = 1:8), Yield 64%, light yellow oil.  $^1\text{H}$  NMR (300 MHz,  $\text{CDCl}_3$ ):  $\delta$  7.49-7.03 (m, 4H), 5.86 (td,  $J = 8.0$  Hz, 6.8 Hz, 3.1 Hz, 1H), 4.79 (tdd,  $J = 8.4$  Hz, 3.2 Hz, 1.6 Hz, 1H), 4.35-4.09 (m, 1H), 2.27 (s, 3H) ppm;  $^{13}\text{C}$  NMR (100 MHz,  $\text{CDCl}_3$ ):  $\delta$  155.25, 135.03, 134.33, 131.01, 129.18, 126.72, 124.69, 75.66, 70.46, 18.84 ppm. HRMS (EI)  $m/z$  calcd for  $\text{C}_{10}\text{H}_{10}\text{O}_3$   $[\text{M}+\text{Na}]^+$ : 201.0528; found: 201.0524.

4-(2-methoxyphenyl)-1,3-dioxolan-2-one **2m**

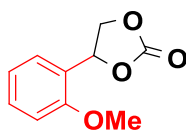

$R_f = 0.7$  (EA/Hexane = 1:10), Yield 78%, yellow oil.  $^1\text{H}$  NMR (400 MHz,  $\text{CDCl}_3$ ):  $\delta$  7.40-7.25 (m, 2H), 7.00-6.87 (m, 2H), 5.75 (t,  $J = 7.8$  Hz, 1H), 4.76 (t,  $J = 8.5$  Hz, 1H), 4.21 (dd,  $J = 8.4$  Hz, 7.1 Hz, 1H), 3.79 (s, 3H) ppm;  $^{13}\text{C}$  NMR (100 MHz,  $\text{CDCl}_3$ ):  $\delta$  156.50, 155.37, 130.53, 126.51, 124.71, 120.66, 110.91, 75.23, 70.45, 55.48 ppm. HRMS (EI)  $m/z$  calcd for  $\text{C}_{10}\text{H}_{10}\text{O}_4$   $[\text{M}+\text{Na}]^+$ : 217.0477; found: 217.0473.

4-(2-(trifluoromethyl)phenyl)-1,3-dioxolan-2-one **2n**

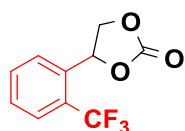

$R_f = 0.7$  (EA/Hexane = 1:5), Yield 31%, light yellow oil.  $^1\text{H NMR}$  (300 MHz,  $\text{CDCl}_3$ ):  $\delta$  7.75-7.40 (m, 4H), 6.03 (m, 1H), 4.88-4.73 (m, 1H), 4.14 (dd,  $J = 8.8$  Hz, 7.2 Hz, 1H) ppm;  $^{13}\text{C NMR}$  (100 MHz,  $\text{CDCl}_3$ ):  $\delta$  154.60, 135.01, 133.09, 129.34, 126.78(d,  $J = 31.0$  Hz), 126.28 (q,  $J = 6.1$  Hz), 125.86, 123.89 (q,  $J = 271.1$  Hz), 73.88 (q,  $J = 2.8$  Hz), 71.45 ppm;  $^{19}\text{F NMR}$  (376 MHz,  $\text{CDCl}_3$ ):  $\delta$  -58.93 ppm. HRMS (EI)  $m/z$  calcd for  $\text{C}_{10}\text{H}_7\text{F}_3\text{O}_3$   $[\text{M}+\text{Na}]^+$ : 255.0245; found: 255.0242.

#### 4-(naphthalen-1-yl)-1,3-dioxolan-2-one **2o**

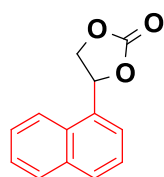

$R_f = 0.7$  (EA/Hexane = 1:5), Yield 76%, brown yellow solid.  $^1\text{H NMR}$  (300 MHz,  $\text{CDCl}_3$ ):  $\delta$  8.02-7.87 (m, 2H), 7.75-7.47 (m, 5H), 6.42 (t,  $J = 7.8$  Hz, 1H), 5.06 (t,  $J = 8.4$  Hz, 1H), 4.39 (dd,  $J = 8.5$  Hz, 7.4 Hz, 1H) ppm;  $^{13}\text{C NMR}$  (100 MHz,  $\text{CDCl}_3$ ):  $\delta$  154.82, 133.81, 131.72, 129.75, 129.47, 129.20, 127.21, 126.37, 125.50, 122.33, 121.54, 75.55, 70.79 ppm. HRMS (EI)  $m/z$  calcd for  $\text{C}_{13}\text{H}_{10}\text{O}_3$   $[\text{M}+\text{Na}]^+$ : 237.0528; found: 237.0523.

#### hexahydrobenzo[d]-1,3-dioxolan-2-one **2p**

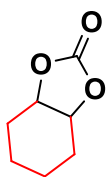

$R_f = 0.6$  (EA/Hexane = 1:10), Yield 61%, brown yellow oil.  $^1\text{H NMR}$  (400 MHz,  $\text{CDCl}_3$ )  $\delta$  5.05 (m, 2H), 2.04 (m, 2H), 1.72 (m, 4H) ppm  $^{13}\text{C NMR}$  (100 MHz,  $\text{CDCl}_3$ )  $\delta$  155.36, 81.75, 33.12, 21.46 ppm. See also: C. J. Whiteoak, N. Kielland, V. Laserna, E. C. Escudero-Adán, E. Martin and A. W. Kleij, *J. Am. Chem. Soc.* 2013, **135**, 1228.

#### 5-methylhexahydrobenzo[d]-1,3-dioxolan-2-one **2q**

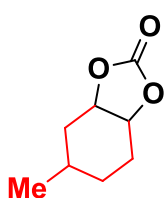

$R_f = 0.7$  (EA/Hexane = 1:8), Yield 52%, brown yellow oil.  $^1\text{H NMR}$  (400 MHz,  $\text{CDCl}_3$ )  $\delta$  4.71 (m, 4H), 2.34 (m, 1H), 2.27 (m, 1H), 2.14 (m, 2H), 1.77 (m, 3H), 1.66 (m, 3H), 1.38 (m, 2H), 1.22 (m, 2H), 1.00 (m, 6H) ppm.  $^{13}\text{C NMR}$  (100 MHz,  $\text{CDCl}_3$ )  $\delta$  155.24, 155.21, 76.49, 75.86, 75.60, 75.24, 36.32, 34.40, 28.36, 27.86, 27.42, 27.17, 26.04, 25.10, 21.87, 21.34 ppm. See also: V. Laserna, G. Fiorani, C. J. Whiteoak, E. Martin, E. Escudero-Adán and A. W. Kleij, *Angew. Chem. Int. Ed.*, 2014, **53**, 10416.



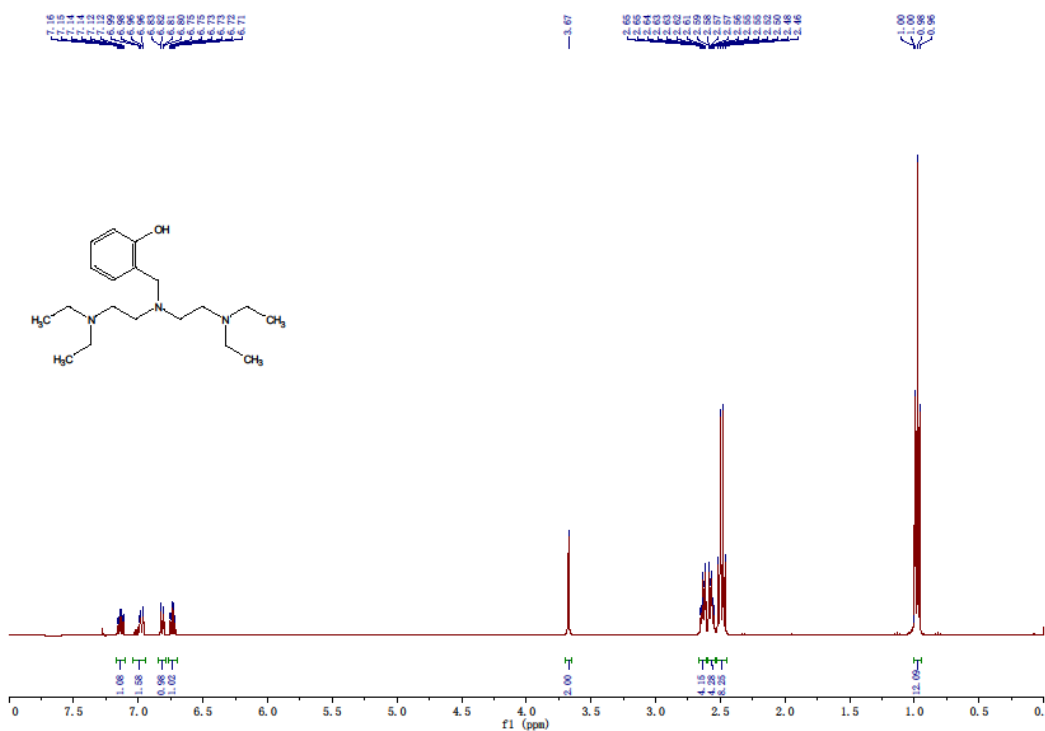

4-(4-tert-butylphenyl)-1,3-dioxolan-2-one **2e**

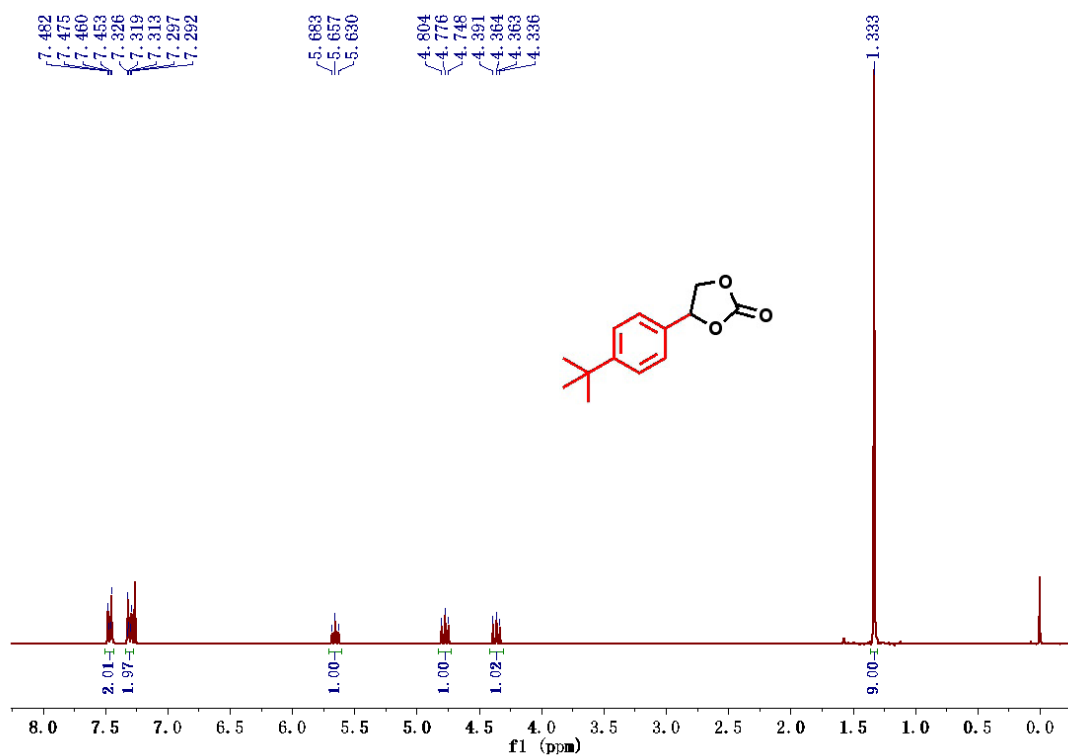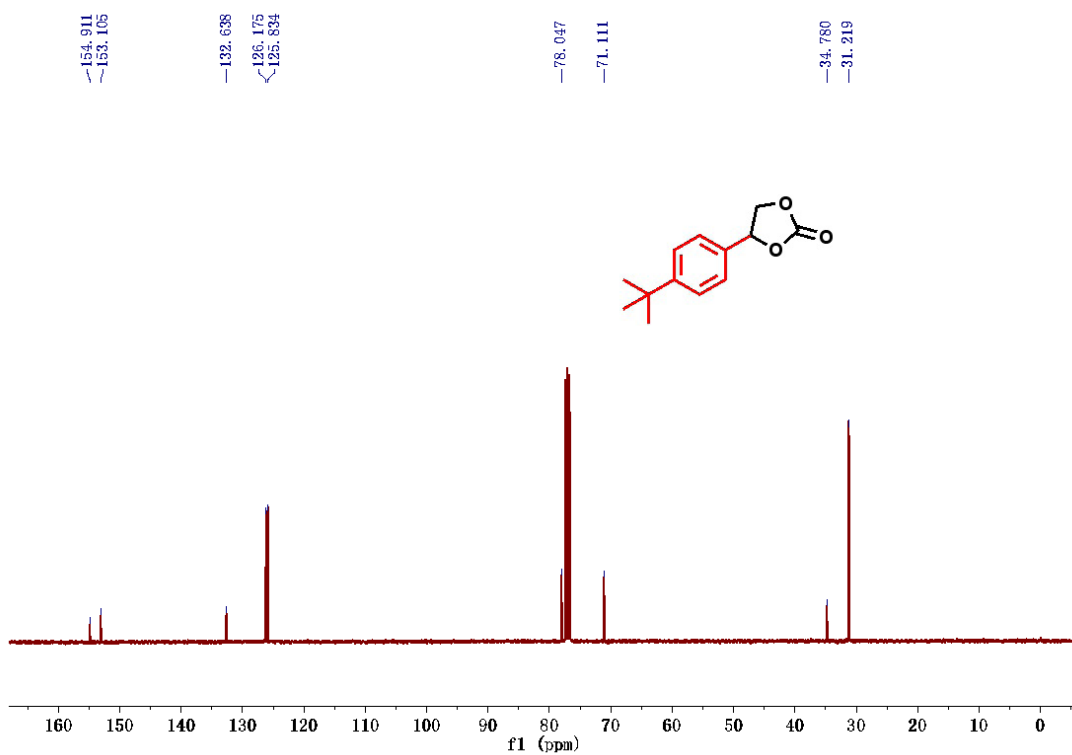

4-(4-methoxyphenyl)-1,3-dioxolan-2-one **2g**

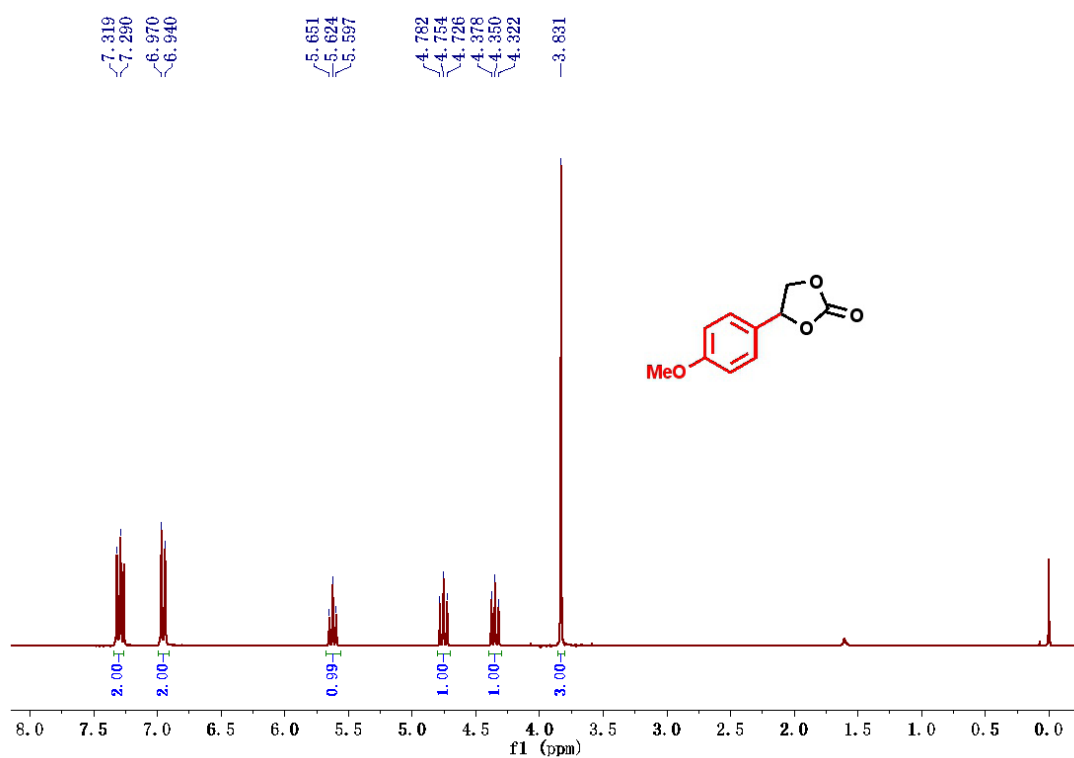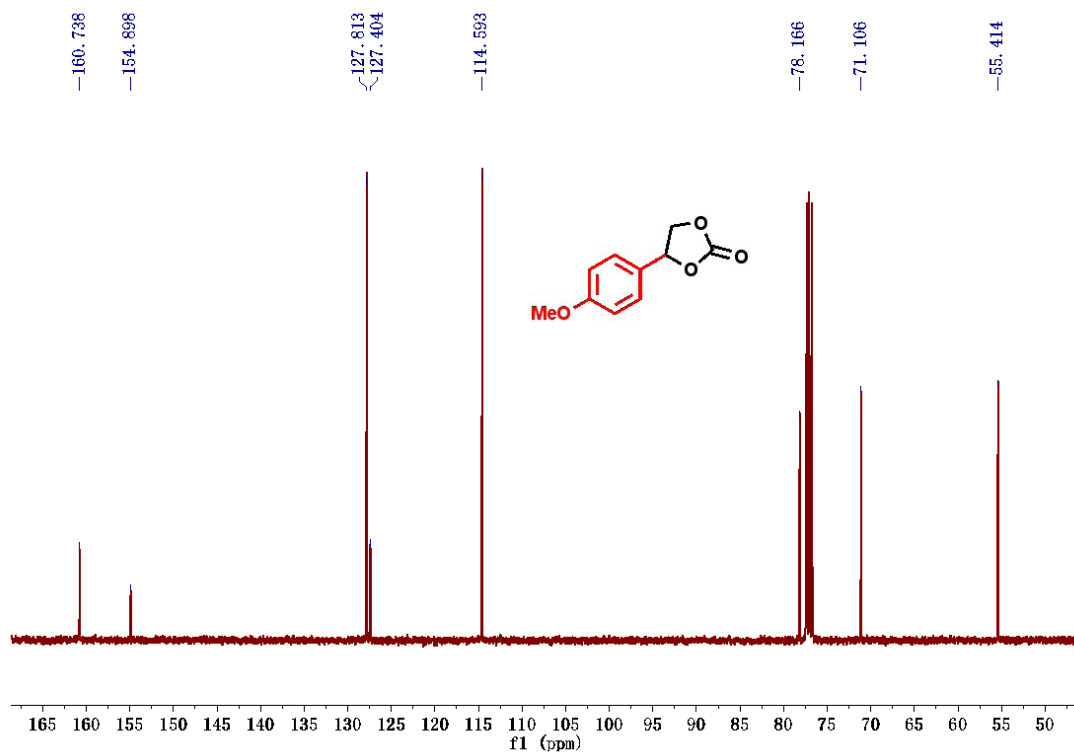

4-(4-(trifluoromethyl)phenyl)-1,3-dioxolan-2-one **2h**

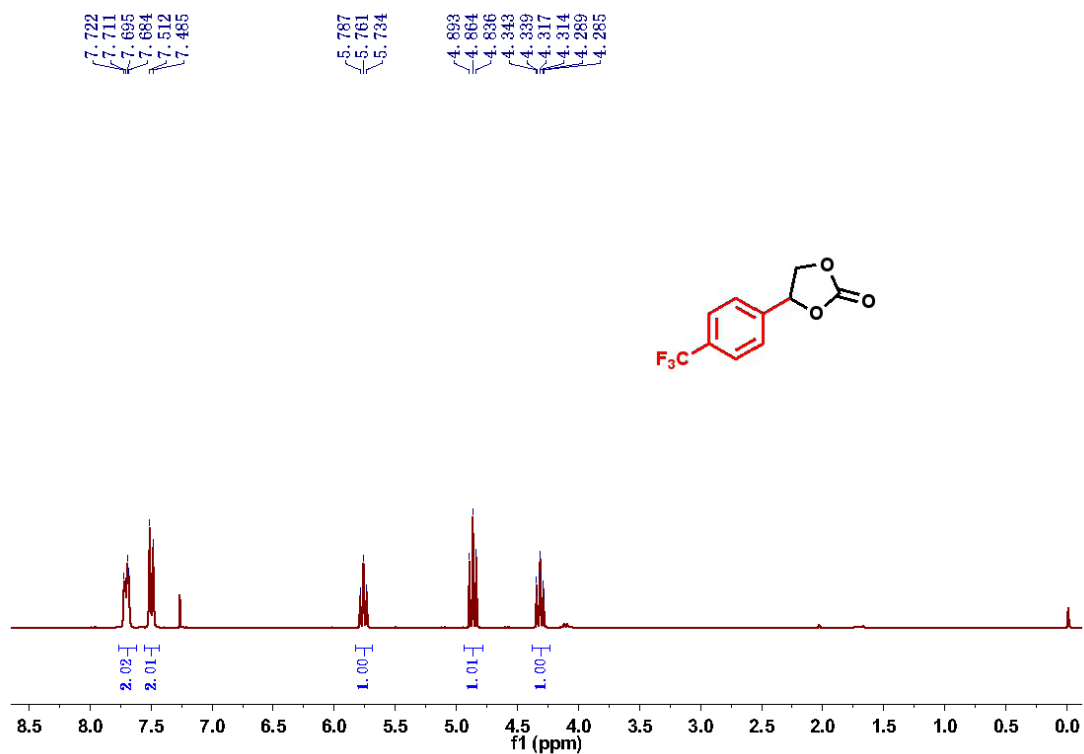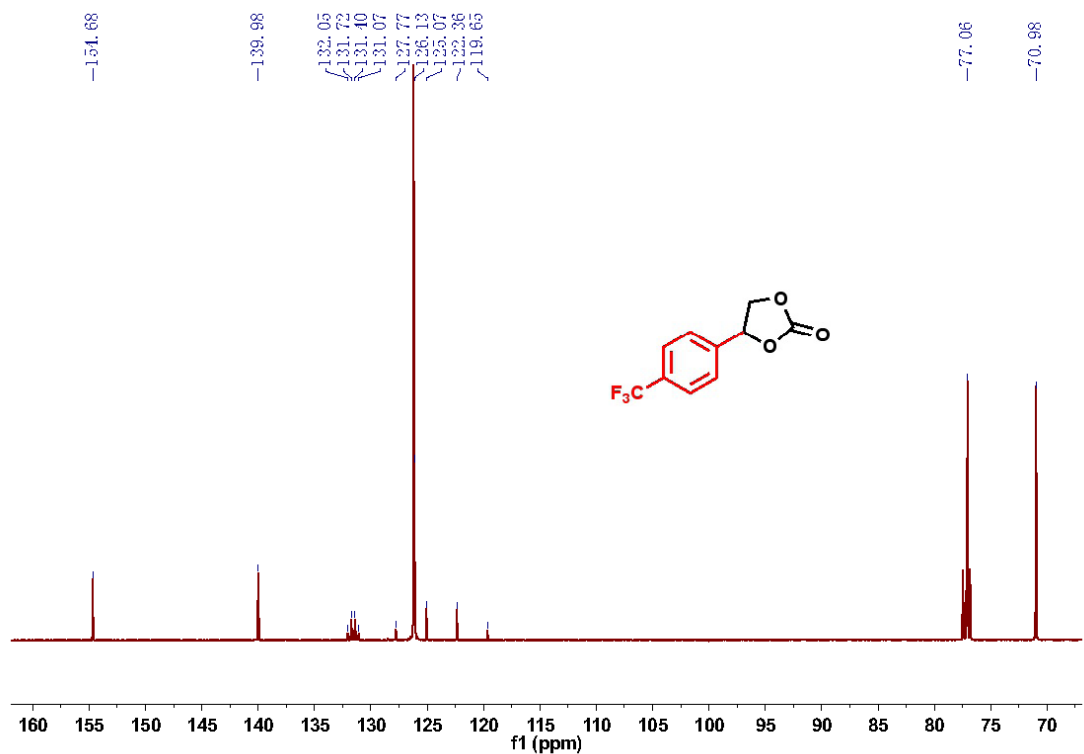

4-m-tolyl-1,3-dioxolan-2-one **2i**

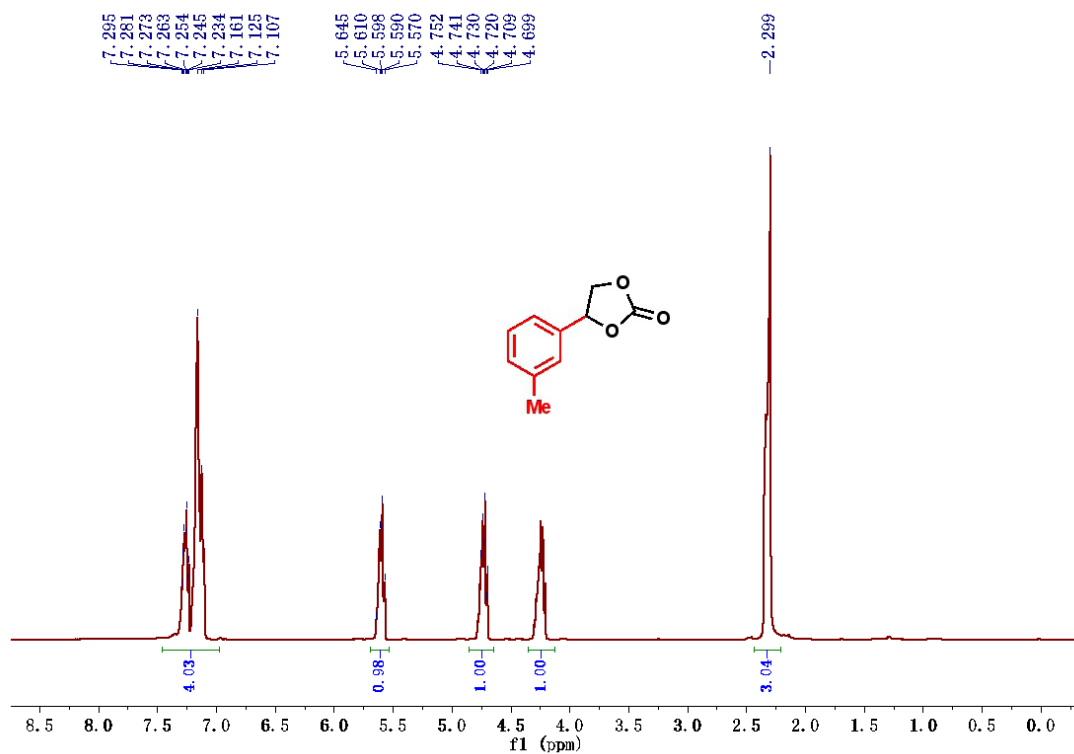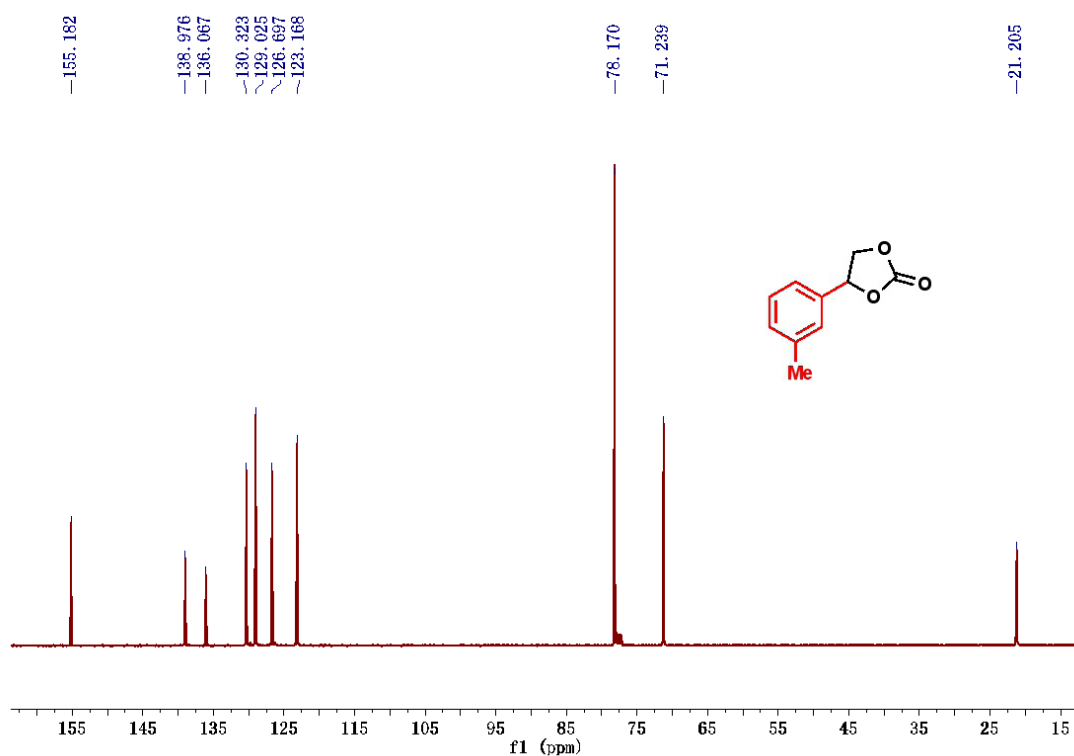



4-(3-(trifluoromethyl)phenyl)-1,3-dioxolan-2-one **2k**

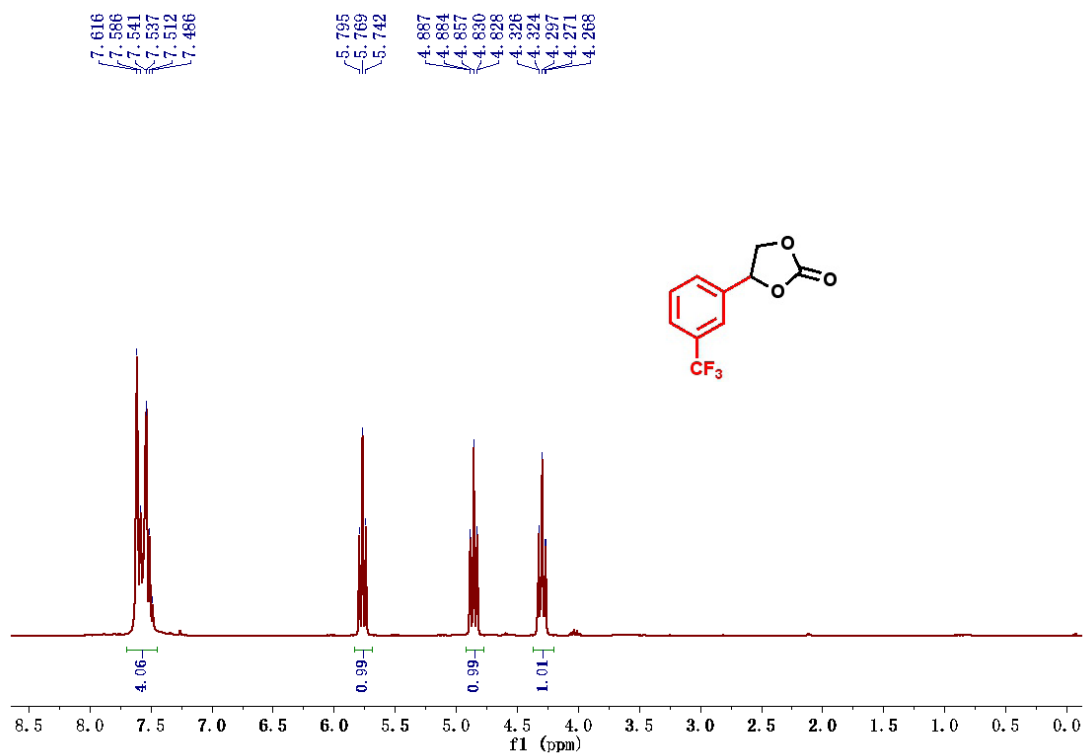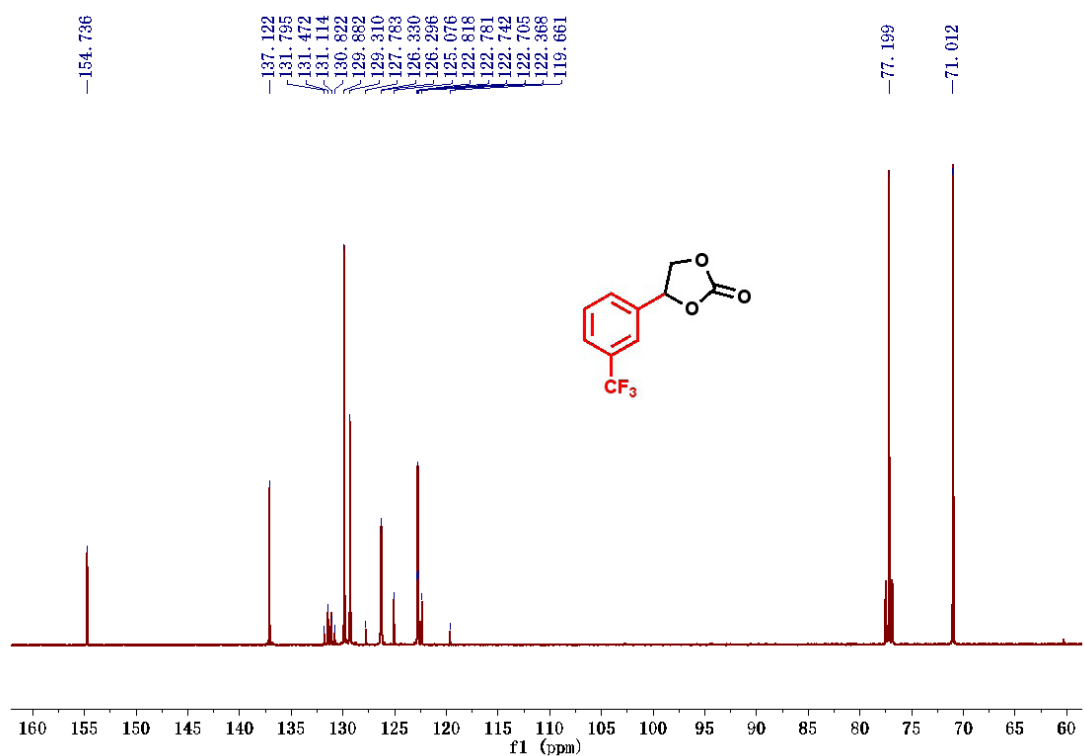

4-o-tolyl-1,3-dioxolan-2-one 2l

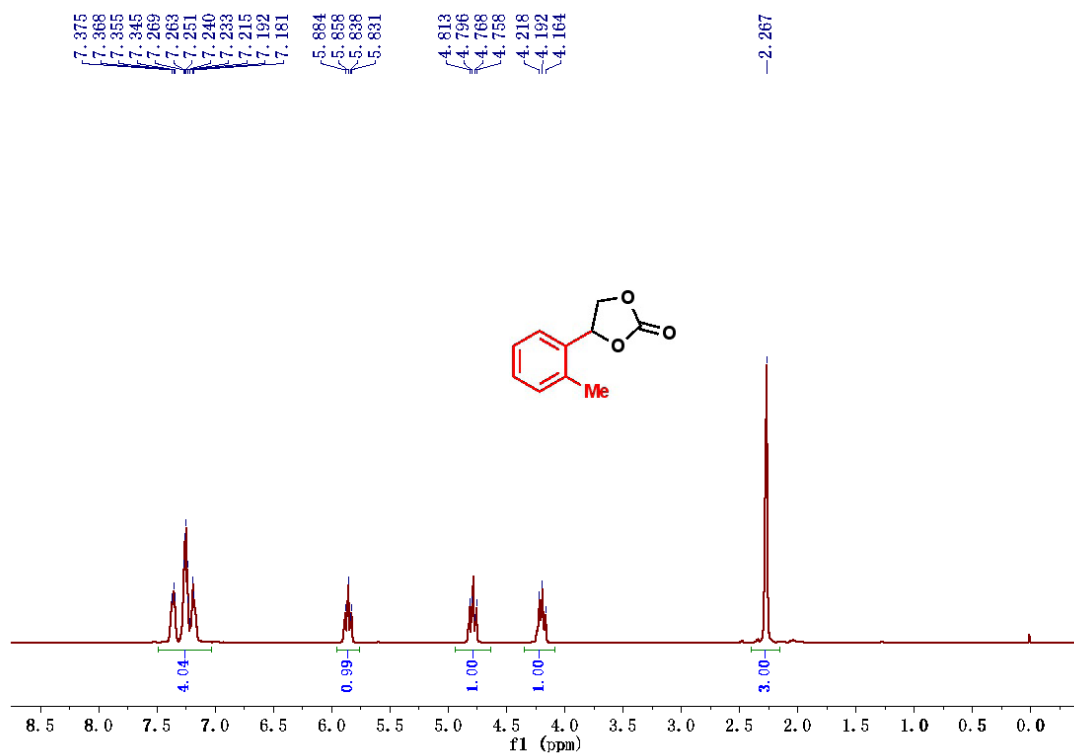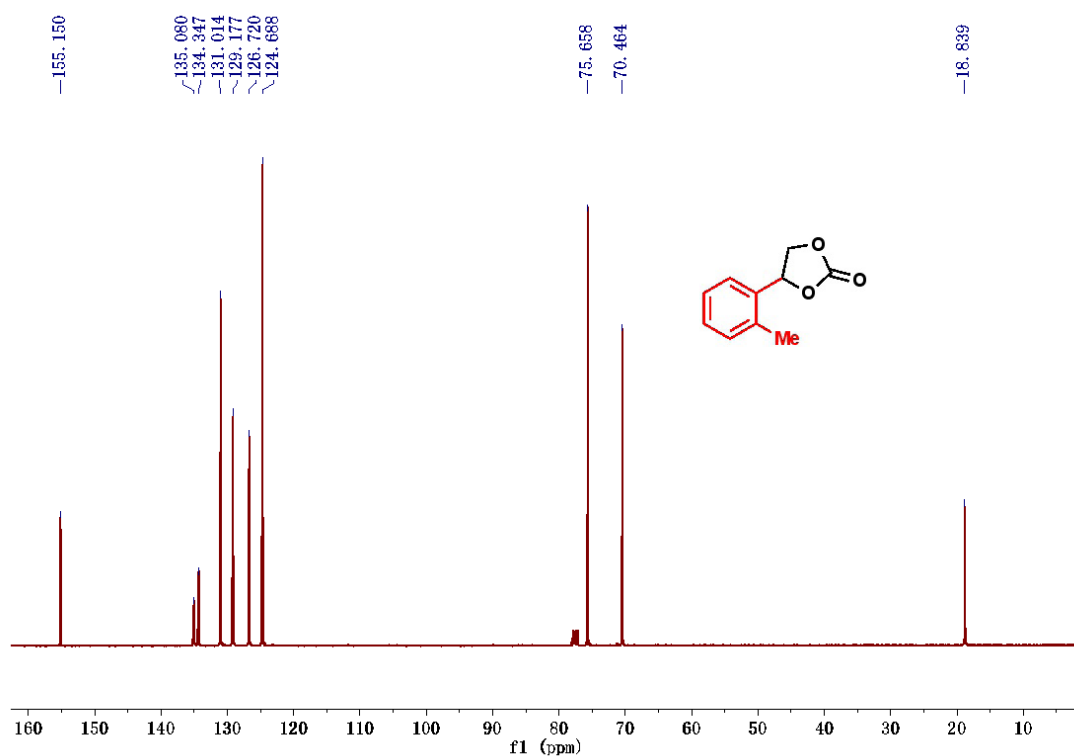

4-(2-methoxyphenyl)-1,3-dioxolan-2-one **2m**

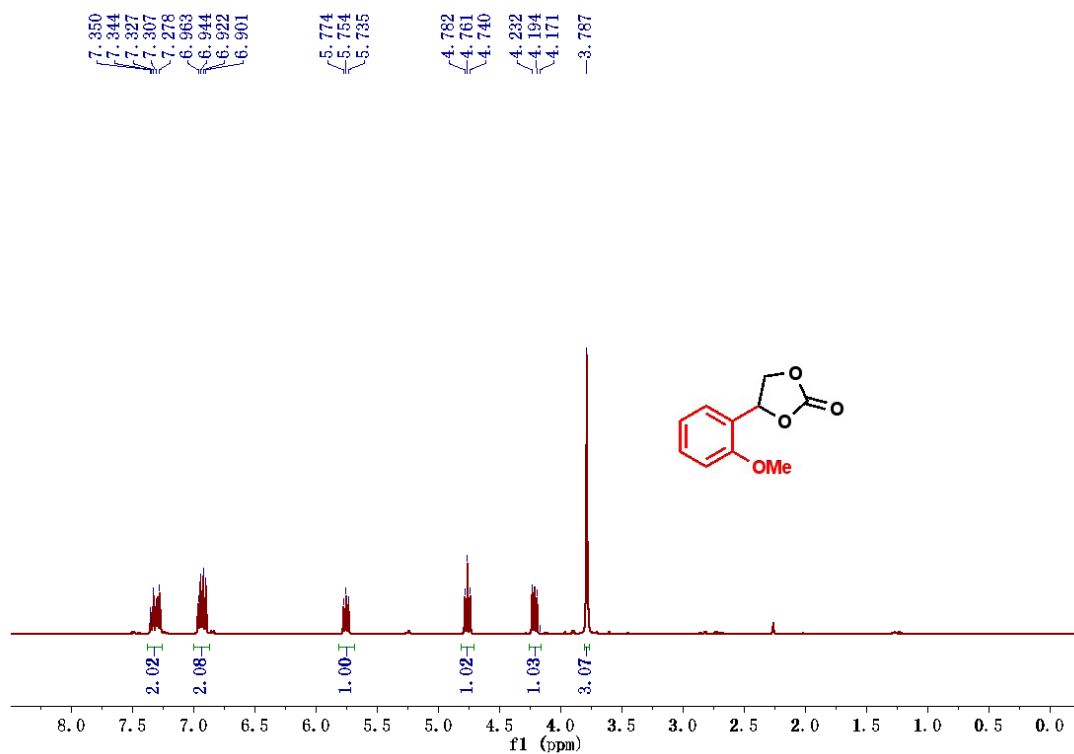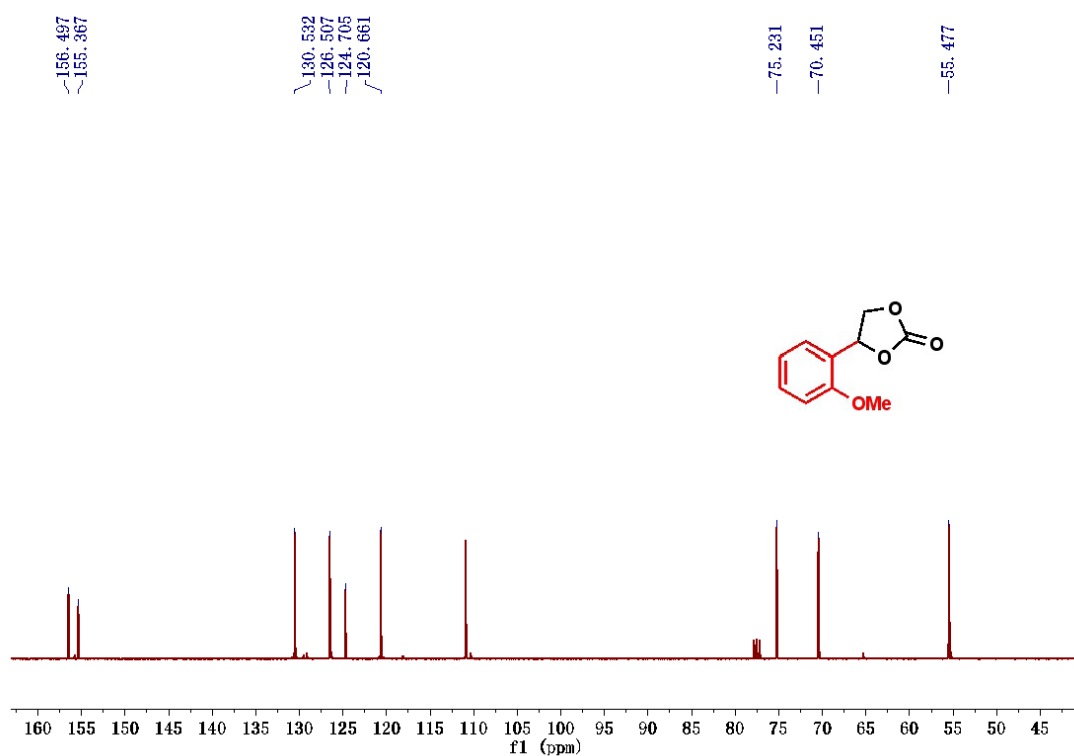

4-(2-(trifluoromethyl)phenyl)-1,3-dioxolan-2-one **2n**

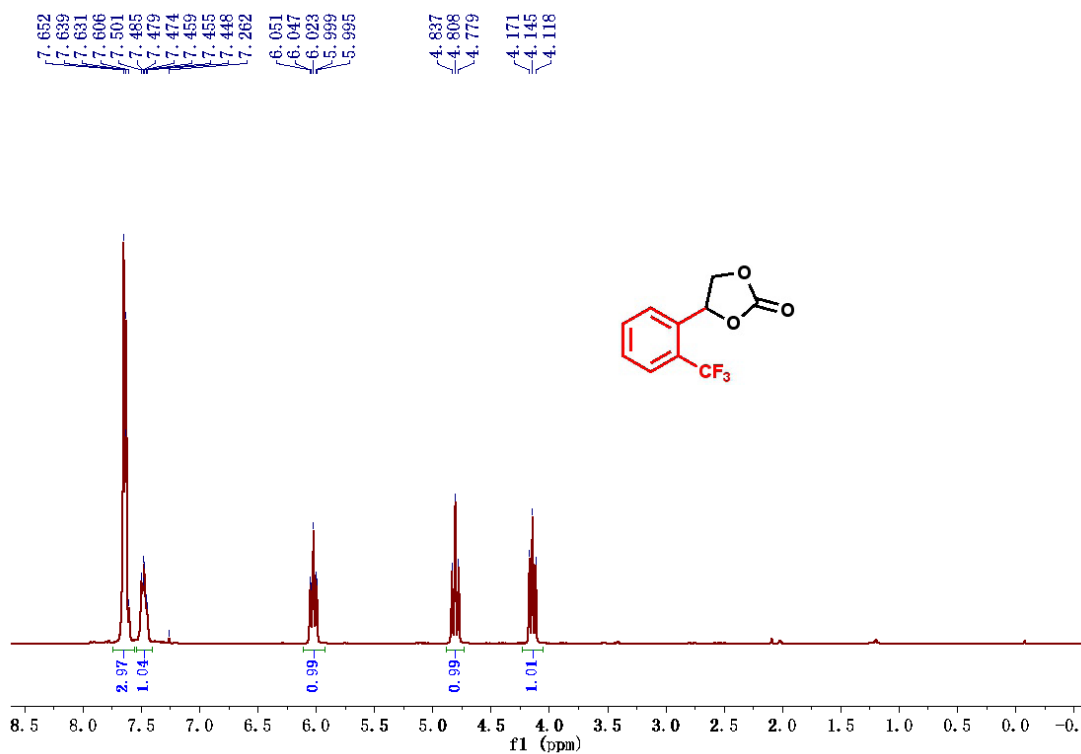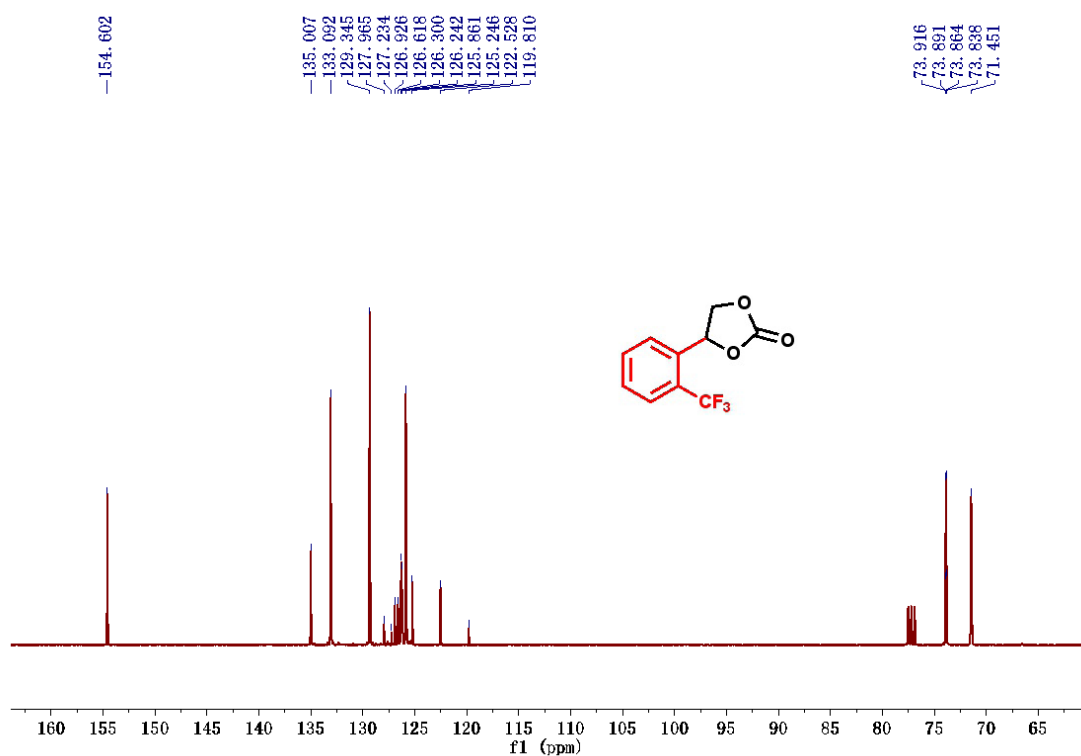

4-(naphthalen-1-yl)-1,3-dioxolan-2-one **2o**

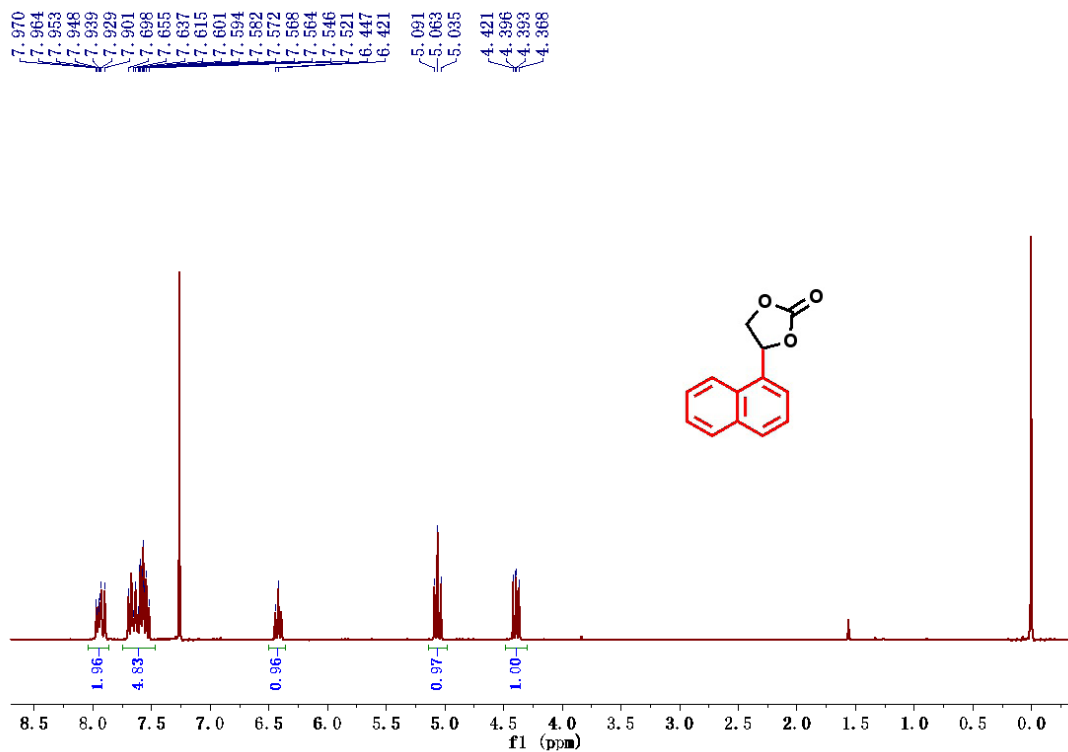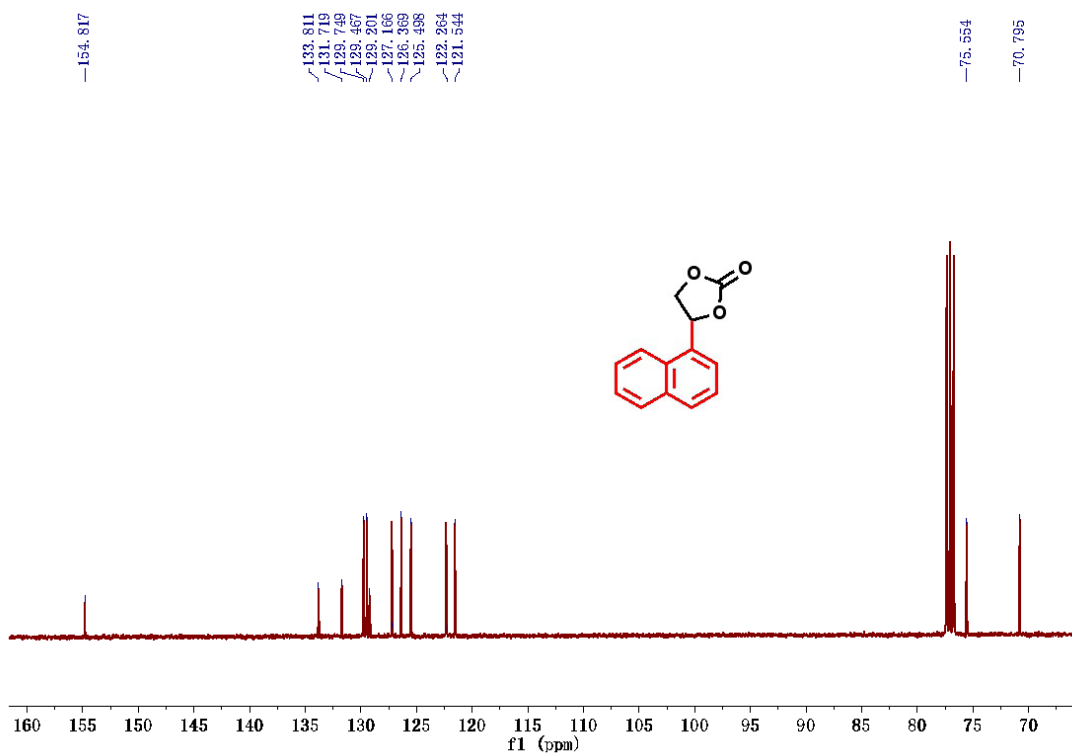

Supplement: c6dt02755e1.pdf [file c6dt02755e1.pdf]
